# Supplementary material for: Prevalence and Predictors of Compassion Fatigue Among Critical Care Nurses in Palestinian Hospitals: A Cross-Sectional Analysis
Source: Research Square preprint supplement (doi:10.21203/rs.3.rs-8397478/v1), 2026-01-19
Supplement: Supplementary file 1 [file 88f2551ec833e435e5fb6191.docx]

***Additional file 1. English version of the study questionnaire (ProQOL-V5 and demographic/work-related items).***

****

**Prevalence of Compassion Fatigue Among Critical Care Nurses in Palestinian Hospitals**

***To the critical care nursing staff,***

This study aims to measure the prevalence of compassion fatigue among critical care nurses and to analyze its impact on nursing practice. Your participation will contribute to a deeper understanding of the challenges faced by nurses in high-pressure work environments, which may help in developing effective support strategies.

Completing the questionnaire will only take a few minutes. We assure you that all data will be kept strictly confidential, and participation is entirely voluntary.

For inquiries, you may contact us via email or at the following phone number:

[ [yafa.ramzi@gmail.com](mailto:yafa.ramzi@gmail.com) ] [ +972 59‑890‑3540 ]

We greatly appreciate your time and efforts in supporting this research.

Research Team. Supervised by: Dr. Khaled Sabarneh.

------------------------------------------------------------------------------

**Section 1: Demographic Data**

| **ITEM** | **OPTIONS** | | | | |
| --- | --- | --- | --- | --- | --- |
| 1. Age | <25 | 25–29 | 30–34 | 35–39 | 40+ |
| 2. Gender | Male | Female |  |  |  |
| 3. Marital Status | Single | Married | Divorced/Widowed |  |  |
| 4. Education Level | Diploma | Bachelor’s | Master’s |  |  |
| 5. Nursing Experience | <1 year | 1–5 years | 6–10 years | >10 years |  |
| 6. Critical Care Experience | <1 year | 1–3 years | 4–6 years | >6 years |  |
| 7. Type of Hospital | Public | Private | NGO |  |  |
| 8. Location | Bethlehem | Hebron | Nablus | Ramallah |  |
| 9. Department | ICU | CCU | Emergency |  |  |
| 10. Shift Type | Fixed day | Fixed night | Rotating |  |  |
| 11. Average Patients per Shift | 1–2 | 3–4 | 5–6 | >6 |  |
| 12. Compassion Fatigue Training | Yes | No |  |  |  |
| 13. Psychological Support Access | Yes | No | Not Sure |  |  |

**Section 2: Compassion Fatigue Survey**

Instructions: Please select the option that reflects your recent experience.

| **Statement** | **Never** | **Rarely** | **Sometimes** | **Often** | **Always** |
| --- | --- | --- | --- | --- | --- |
| 1. **I am happy** |  |  |  |  |  |
| 1. **I feel preoccupied with multiple people I help** |  |  |  |  |  |
| 1. **I get satisfaction from helping** |  |  |  |  |  |
| 1. **I feel connected to others** |  |  |  |  |  |
| 1. **I am startled by unexpected sounds** |  |  |  |  |  |
| 1. **I feel energized after helping** |  |  |  |  |  |
| 1. **I struggle to separate personal and professional life** |  |  |  |  |  |
| 1. **I lose sleep over traumatic cases** |  |  |  |  |  |
| 1. **I am affected by others’ traumatic stress** |  |  |  |  |  |
| 1. **I feel trapped in my job** |  |  |  |  |  |
| 1. **I feel tense about various things** |  |  |  |  |  |
| 1. **I like my job** |  |  |  |  |  |
| 1. **I feel depressed from others’ trauma** |  |  |  |  |  |
| 1. **I feel like I live the trauma of those I help** |  |  |  |  |  |
| 1. **My beliefs sustain me** |  |  |  |  |  |
| 1. **I am satisfied with my professional development** |  |  |  |  |  |
| 1. **I am the person I want to be** |  |  |  |  |  |
| 1. **My job makes me feel fulfilled** |  |  |  |  |  |
| 1. **I feel exhausted from my work** |  |  |  |  |  |
| 1. **I have positive feelings about those I help** |  |  |  |  |  |
| 1. **I feel overwhelmed by my workload** |  |  |  |  |  |
| 1. **I believe my work makes a difference** |  |  |  |  |  |
| 1. **I avoid activities that remind me of traumatic events** |  |  |  |  |  |
| 1. **I am proud of my ability to help** |  |  |  |  |  |
| 1. **I experience intrusive thoughts** |  |  |  |  |  |
| 1. **I feel weighed down by the system** |  |  |  |  |  |
| 1. **I consider myself successful** |  |  |  |  |  |
| 1. **I forget important aspects of trauma cases** |  |  |  |  |  |
| 1. **I am a very caring person** |  |  |  |  |  |
| 1. **I am happy I chose this profession** |  |  |  |  |  |
